# Supplementary material
Source: PubMed Central journal article supplement (PMC2815585)
Supplement: supp_48_2_460__1.pdf [file supp_48_2_460__1.pdf]

Table S1 (supplementary material): Probe sequences

| probe name            | probe sequence(5'-3') <sup>a</sup>                | length w/o spacer <sup>b</sup> | T <sub>m</sub> <sup>c</sup> |
|-----------------------|---------------------------------------------------|--------------------------------|-----------------------------|
| TEM-specific probes   |                                                   |                                |                             |
| TEM 6                 | TTTTTTTTTTTTTATGAGTAT <u>TNA</u> ACATTTTCGTG      | 22                             | 49.2                        |
| TEM 16                | TTTTTTTTTTTTTATTCCTTT <u>NT</u> TGCGGCAT          | 20                             | 53.1                        |
| TEM 21                | TTTTTTTTTTTTTGCATTTTGC <u>NT</u> TCCTGTTTT        | 20                             | 52.3                        |
| TEM 34                | TTTTTTTTTTTTTGTGAAAGT <u>ANA</u> AGATGCTGAA       | 22                             | 51.2                        |
| TEM 35 <sub>WT</sub>  | TTTTTTTTTTTTTGTGAAAGTAAAA <u>GAT</u> GCTGAAGAT    | 23                             | 50.3                        |
| TEM 35 <sub>MUT</sub> | TTTTTTTTTTTTTGTGAAAGTAAAA <u>CC</u> TGCTGAAGAT    | 23                             | 52.5                        |
| TEM 39                | TTTTTTTTTTTTTCTGAAGAT <u>NAG</u> TGGGTGC          | 19                             | 53.4                        |
| TEM 42                | TTTTTTTTTTTTTATCAGTTGGGT <u>GNA</u> CGAGTGGGTTA   | 25                             | 62.2                        |
| TEM 51                | TTTTTTTTTTTTTATCGAACTGGAT <u>CNCA</u> ACAGCGGTAAG | 27                             | 59.8                        |
| TEM 69.1              | TTTTTTTTTTTTTTCGTTTCCAATG <u>NTG</u> AGCACTTTTAA  | 26                             | 54.7                        |
| TEM 69.2              | TTTTTTTTTTTTTTTTTCCAATGAT <u>NAG</u> CACTTTTAA    | 24                             | 51.6                        |
| TEM 80                | TTTTTTTTTTTTTATGTGGTGC <u>GNA</u> TTATCCC         | 20                             | 54.7                        |
| TEM 84                | TTTTTTTTTTTTTATCCCGT <u>NT</u> TGACGCCG           | 19                             | 54.7                        |
| TEM 92                | TTTTTTTTTTTTTGCAACTC <u>GN</u> TCGCCGA            | 17                             | 62.0                        |
| TEM 104               | TTTTTTTTTTTTTGACTTGGT <u>TNA</u> GACTCACC         | 20                             | 52.6                        |
| TEM 114               | TTTTTTTTTTTTTAAAAGCTTCTT <u>NC</u> GGATGGCA       | 21                             | 50.4                        |
| TEM 115               | TTTTTTTTTTTTTATCTTACG <u>NT</u> TGGCATGAC         | 19                             | 52.1                        |
| TEM 124               | TTTTTTTTTTTTTAGAATTATGCAN <u>TG</u> CTGCCATA      | 22                             | 54.6                        |
| TEM 127               | TTTTTTTTTTTTTGTGCTGCC <u>NTA</u> ACCATGA          | 18                             | 52.7                        |
| TEM 130               | TTTTTTTTTTTTTGCCATAACCATG <u>NGT</u> GATAAACACTG  | 26                             | 57.0                        |
| TEM 145               | TTTTTTTTTTTTTCGGAGGAN <u>C</u> GAAGGAGC           | 17                             | 58.0                        |
| TEM 153               | TTTTTTTTTTTTTCCGCTTTTTTGC <u>NC</u> AAATGGGGG     | 24                             | 61.8                        |
| TEM 157               | TTTTTTTTTTTTTGGGGG <u>AN</u> CATGTAACTC           | 18                             | 50.9                        |
| TEM 158               | TTTTTTTTTTTTTATGGGGGAT <u>NA</u> TGTAACTCG        | 20                             | 54.1                        |
| TEM 163               | TTTTTTTTTTTTTCTCGCCTT <u>GN</u> TCGTTGGGA         | 19                             | 57.4                        |
| TEM 164.1             | TTTTTTTTTTTTTGCCTTGAT <u>NGT</u> TGGGAA           | 17                             | 52.4                        |
| TEM 164.2             | TTTTTTTTTTTTTGCCTTGAT <u>CNT</u> TGGGAACC         | 19                             | 56.4                        |
| TEM 165.1             | TTTTTTTTTTTTTGTATCGT <u>NG</u> GGAACCG            | 17                             | 52.4                        |
| TEM 165.2             | TTTTTTTTTTTTTGTATCGT <u>TGN</u> GAACCGGAG         | 19                             | 57.1                        |
| TEM 173               | TTTTTTTTTTTTTGAATGAAGCC <u>NTA</u> CCAAAC         | 20                             | 50.7                        |
| TEM 175               | TTTTTTTTTTTTTCCATACCA <u>AN</u> CACGAGC           | 18                             | 53.5                        |
| TEM 179               | TTTTTTTTTTTTTACGAGCGT <u>GAN</u> ACCATGAT         | 19                             | 54.5                        |
| TEM 182               | TTTTTTTTTTTTTCACCAG <u>AN</u> GCCTGTAG            | 17                             | 52.8                        |
| TEM 184               | TTTTTTTTTTTTTCGATTCCT <u>GN</u> AGCAATGGCA        | 20                             | 58.7                        |
| TEM 196.1             | TTTTTTTTTTTTTAACTATTA <u>ACTNG</u> CGAACTACTT     | 23                             | 51.8                        |
| TEM 196.2             | TTTTTTTTTTTTTACTATTA <u>ACTGN</u> CGAACTACTT      | 22                             | 51.3                        |
| TEM 204               | TTTTTTTTTTTTTCTAGCTTCC <u>CNG</u> CAACAATTA       | 21                             | 55.1                        |
| TEM 218               | TTTTTTTTTTTTTAGTTGCAG <u>NA</u> CCACTTCT          | 18                             | 53.6                        |
| TEM 221               | TTTTTTTTTTTTTACCCTT <u>NT</u> TGCGCTCG            | 16                             | 55.4                        |
| TEM 224               | TTTTTTTTTTTTTGTTCGCTC <u>GGN</u> CCCTTC           | 17                             | 53.5                        |
| TEM 237.1             | TTTTTTTTTTTTTAAACTTGGA <u>AN</u> CCGGTGAGC        | 19                             | 57.8                        |
| TEM 237.2             | TTTTTTTTTTTTTATCTGGAG <u>ANC</u> CGTGAG           | 16                             | 54.0                        |
| TEM 238.1             | TTTTTTTTTTTTTCTGGAGCC <u>NGT</u> GAGCGT           | 17                             | 60.7                        |
| TEM 238.2             | TTTTTTTTTTTTTCTGGAGCC <u>GNT</u> GAGCGTG          | 18                             | 61.5                        |
| TEM 240               | TTTTTTTTTTTTTGTGAGCCGGT <u>NAG</u> CGTGGGT        | 18                             | 63.3                        |
| TEM 244.1             | TTTTTTTTTTTTTGTGGGTCT <u>NG</u> CGGTATC           | 17                             | 55.3                        |
| TEM 244.2             | TTTTTTTTTTTTTGTGGGTCT <u>CN</u> CGGTATCAT         | 19                             | 56.9                        |
| TEM 262               | TTTTTTTTTTTTTCCGTATCGT <u>ANT</u> TATCTACACG      | 22                             | 52.0                        |
| TEM 265               | TTTTTTTTTTTTTATCTAC <u>AN</u> GACGGGGA            | 18                             | 52.1                        |
| TEM 268               | TTTTTTTTTTTTTCGACGGGG <u>NGT</u> CAGGCA           | 17                             | 60.1                        |
| TEM 275               | TTTTTTTTTTTTTATGGATGAA <u>CN</u> AAATAGACAG       | 21                             | 50.0                        |

| probe name               | probe sequence(5'-3') <sup>a</sup>      | length w/o spacer <sup>b</sup> | T <sub>M</sub> <sup>c</sup> |
|--------------------------|-----------------------------------------|--------------------------------|-----------------------------|
| TEM 276                  | TTTTTTTTTTTTTTGGATGAACGANATAGACAGAT     | 21                             | 49.8                        |
| TEM 280                  | TTTTTTTTTTTTTTAGACAGATCGNTGAGATAGGTG    | 23                             | 55.3                        |
| SHV-specific probes      |                                         |                                |                             |
| SHV 7                    | TTTTTTTTTTTTTTATGCGTINATATTCGCCTGT      | 19                             | 51.8                        |
| SHV 8                    | TTTTTTTTTTTTTTATGCGTTATNTTCGCCTGT       | 19                             | 51.8                        |
| SHV 10                   | TTTTTTTTTTTTTTGTTATATTCGCCNNGTGTATATCT  | 24                             | 50.4                        |
| SHV 18                   | TTTTTTTTTTTTTTCTGTAGCCNCCCTGCCG         | 18                             | 58.8                        |
| SHV 19                   | TTTTTTTTTTTTTTAGCCACCNITGCCGC           | 15                             | 58.6                        |
| SHV 25                   | TTTTTTTTTTTTTTTCGGTACACNCCAGCCC         | 16                             | 59.5                        |
| SHV 35                   | TTTTTTTTTTTTTTAGCAAATTAACAAGCGAAAGCC    | 24                             | 54.5                        |
| SHV 43 <sub>WT</sub>     | TTTTTTTTTTTTTTGTGCGGGCCGCGTAGG          | 16                             | 61.1                        |
| SHV 43 <sub>MUT</sub>    | TTTTTTTTTTTTTTGTGCGGGCAGCGTAGG          | 16                             | 57.8                        |
| SHV 48                   | TTTTTTTTTTTTTTGTAGGCATGATANAATGGATCTGG  | 25                             | 55.1                        |
| SHV 61                   | TTTTTTTTTTTTTTGCCTGGNNGTGCCGAT          | 15                             | 57.1                        |
| SHV 64                   | TTTTTTTTTTTTTTTCGCCGATGNACGCTTCC        | 18                             | 57.2                        |
| SHV 69                   | TTTTTTTTTTTTTTTCCCATGATINAGCACCTTT      | 20                             | 54.3                        |
| SHV 80                   | TTTTTTTTTTTTTTTCGGCGCANITGCTGGC         | 15                             | 61.5                        |
| SHV 89                   | TTTTTTTTTTTTTTGCCGGTGACNAACAGCT         | 17                             | 58.4                        |
| SHV 112                  | TTTTTTTTTTTTTTTCAGCGAAAAANACCTTGCC      | 19                             | 55.2                        |
| SHV 112.SM               | TTTTTTTTTTTTTTTCAGCGAAAAANATCTTGCC      | 20                             | 54.0                        |
| SHV 113                  | TTTTTTTTTTTTTTTCGAAAAACACNITGCGGACG     | 20                             | 57.3                        |
| SHV 114                  | TTTTTTTTTTTTTTTAAACACCTTNCCGACGG        | 17                             | 56.0                        |
| SHV 114.SM               | TTTTTTTTTTTTTTTGAAAAACATCTTNCCGACGG     | 20                             | 54.7                        |
| SHV 119                  | TTTTTTTTTTTTTTTGCATGACGNITCGGCGAA       | 17                             | 58.7                        |
| SHV 122                  | TTTTTTTTTTTTTTGTGCGCGAANTCTGCG          | 16                             | 56.7                        |
| SHV 124                  | TTTTTTTTTTTTTTTAACTCTGCNCCGCCG          | 15                             | 59.6                        |
| SHV 126                  | TTTTTTTTTTTTTTTCGCCGCCGNCAATTACC        | 16                             | 60.6                        |
| SHV 129                  | TTTTTTTTTTTTTTTCGCCCATACCNTTAGCGATAACAG | 25                             | 55.0                        |
| SHV 130                  | TTTTTTTTTTTTTTTCCATTACCATGNCGATAACAGC   | 23                             | 56.0                        |
| SHV 134                  | TTTTTTTTTTTTTTTAAACAGCGNCGCCAATC        | 17                             | 56.1                        |
| SHV 140 <sub>WT</sub>    | TTTTTTTTTTTTTTTCTGCTACTGGCCACCGTCGG     | 20                             | 62.9                        |
| SHV 140 <sub>MUT</sub>   | TTTTTTTTTTTTTTTCTGCTACTCCGGACCGTCGG     | 20                             | 62.0                        |
| SHV 142                  | TTTTTTTTTTTTTTTGGCCACCNTCGGCGG          | 15                             | 63.7                        |
| SHV 145                  | TTTTTTTTTTTTTTTGC GGCCNCGCAGGAT         | 15                             | 62.7                        |
| SHV 146                  | TTTTTTTTTTTTTTTCGGCCCCGNAGGATTG         | 16                             | 60.1                        |
| SHV 148                  | TTTTTTTTTTTTTTTCCCGCAGGANITGACTG        | 16                             | 53.1                        |
| SHV 149                  | TTTTTTTTTTTTTTTAGGATTGNCTGCCTTT         | 16                             | 47.4                        |
| SHV 156                  | TTTTTTTTTTTTTTTCCAGATCGNCGACAACG        | 17                             | 56.4                        |
| SHV 158                  | TTTTTTTTTTTTTTTCGGCGACAANGTCAACC        | 17                             | 59.6                        |
| SHV 167 <sub>WT</sub>    | TTTTTTTTTTTTTTTCTGGGAAACGGAACCTGAATG    | 20                             | 53.7                        |
| SHV 167 <sub>MUT</sub>   | TTTTTTTTTTTTTTTCTGGGAAACTGACCGCTGGG     | 20                             | 60.8                        |
| SHV 173                  | TTTTTTTTTTTTTTTATGAGCGGNTTCCCGG         | 16                             | 58.3                        |
| SHV 175 <sub>WT</sub>    | TTTTTTTTTTTTTTTCTTCCCGGCGACGC           | 14                             | 57.2                        |
| SHV 175 <sub>MUT</sub>   | TTTTTTTTTTTTTTTCTTCCCGCCGACGC           | 14                             | 57.2                        |
| SHV 175 <sub>WT</sub>    | TTTTTTTTTTTTTTTGCTTCCCGGCGACTCC         | 16                             | 54.0                        |
| SHV 175 <sub>MUT</sub>   | TTTTTTTTTTTTTTTGCTTCCCGCCGACTCC         | 16                             | 54.0                        |
| SHV 179.1                | TTTTTTTTTTTTTTTCGCCCGCNACACCAC          | 15                             | 60.7                        |
| SHV 179.2                | TTTTTTTTTTTTTTTGCCCGCGNACCACT           | 15                             | 59.0                        |
| SHV 187                  | TTTTTTTTTTTTTTTCCAGCATGNCCGCGAC         | 16                             | 60.6                        |
| SHV 192/3 <sub>WT</sub>  | TTTTTTTTTTTTTTTGCGCAAGCTGCTGACCA        | 17                             | 59.4                        |
| SHV 192/3 <sub>MUT</sub> | TTTTTTTTTTTTTTTGCGCAACGTGCTGACCA        | 17                             | 59.5                        |

| probe name                           | probe sequence(5'-3') <sup>a</sup>                            | length w/o spacer <sup>b</sup> | T <sub>m</sub> <sup>c</sup> |
|--------------------------------------|---------------------------------------------------------------|--------------------------------|-----------------------------|
| SHV 195                              | TTTTTTTTTTTTTGTCTGCTG <u>ANC</u> AGCCAGC                      | 17                             | 60.0                        |
| SHV 205                              | TTTTTTTTTTTTTGTTCGCA <u>ANC</u> NGCAGCTG                      | 17                             | 57.8                        |
| SHV 206                              | TTTTTTTTTTTTTGTGCAACGGC <u>AN</u> CTGCTG                      | 16                             | 58.2                        |
| SHV 226                              | TTTTTTTTTTTTTCCGTGCTG <u>CCG</u> TCG                          | 14                             | 50.6                        |
| SHV 238/240 <sub>GEg</sub>           | TTTTTTTTTTTTTGGAGCT <u>GCG</u> AGCG                           | 14                             | 57.0                        |
| SHV 238/240 <sub>SEg</sub>           | TTTTTTTTTTTTTCGGAGCT <u>AGC</u> AGCGG                         | 16                             | 58.8                        |
| SHV 238/240 <sub>SKg</sub>           | TTTTTTTTTTTTTCGGAGCT <u>AGCA</u> AGCGG                        | 16                             | 56.3                        |
| SHV 238/240 <sub>AEg</sub>           | TTTTTTTTTTTTTGGAGCT <u>GCG</u> AGCG                           | 14                             | 57.0                        |
| SHV 238/240 <sub>GEa</sub>           | TTTTTTTTTTTTTGGAGCT <u>GCG</u> AAACGG                         | 15                             | 56.7                        |
| SHV 238/240 <sub>SEa</sub>           | TTTTTTTTTTTTTCGGAGCT <u>AGCG</u> AAACGGG                      | 17                             | 58.6                        |
| SHV 238/240 <sub>SKa</sub>           | TTTTTTTTTTTTTGGAGCT <u>AGCA</u> AAACGGG                       | 16                             | 53.1                        |
| SHV 238/240 <sub>AEa</sub>           | TTTTTTTTTTTTTGGAGCT <u>GCG</u> AAACGG                         | 15                             | 56.7                        |
| SHV 238/240 <sub>AK</sub>            | TTTTTTTTTTTTTGGAGCT <u>GCA</u> AAACGG                         | 15                             | 54.0                        |
| SHV 243                              | TTTTTTTTTTTTTCCGGGGT <u>GNG</u> TGCG                          | 14                             | 54.1                        |
| SHV 268                              | TTTTTTTTTTTTTCTGCGT <u>GAT</u> NCCCGG                         | 16                             | 48.2                        |
| SHV 269                              | TTTTTTTTTTTTTGATA <u>CC</u> NGGCGAGCAT                        | 17                             | 57.6                        |
| SHV 278                              | TTTTTTTTTTTTTAAATCAGC <u>AN</u> ATCGCCGGG                     | 19                             | 56.4                        |
| CTX-M group discrimination           |                                                               |                                |                             |
| CTX-M 73.M1/M2                       | TTTTTTTTTTTTTACCAGTA <u>ANG</u> TGATGGCCG                     | 19                             | 55.0                        |
| CTX-M 73.M9                          | TTTTTTTTTTTTTGTACCAGTA <u>ANG</u> TATGGCGG                    | 21                             | 53.2                        |
| CTX-M 132.M1                         | TTTTTTTTTTTTTGTGCATAACGT <u>NG</u> CAGTAA                     | 19                             | 55.7                        |
| CTX-M 267.M2                         | TTTTTTTTTTTTTT <u>TAC</u> CCA <u>ACC</u> GAGCAG               | 17                             | 54.6                        |
| CTX-M 267.M1                         | TTTTTTTTTTTTTT <u>CAC</u> CCAG <u>CC</u> TCA <u>ACCT</u>      | 17                             | 56.1                        |
| CTX-M 267.M8                         | TTTTTTTTTTTTTT <u>CAC</u> CCAG <u>CC</u> AGAGCAG              | 17                             | 57.4                        |
| CTX-M 267.M9                         | TTTTTTTTTTTTTT <u>TAC</u> CCAG <u>CC</u> GCA <u>AC</u> CAG    | 17                             | 55.5                        |
| probes specific for the CTX-M1 group |                                                               |                                |                             |
| CTX-M 12                             | TTTTTTTTTTTTTTCGACAGC <u>AN</u> CCGTACAG                      | 17                             | 50.4                        |
| CTX-M 23                             | TTTTTTTTTTTTT <u>AGT</u> GCC <u>ACT</u> G <u>NA</u> TGCACAAAC | 21                             | -                           |
| CTX-M 27                             | TTTTTTTTTTTTTTCGCAAAAC <u>AGN</u> GGACGTACA                   | 19                             | 52.9                        |
| CTX-M 35                             | TTTTTTTTTTTTTTAAACT <u>TACC</u> GNATTAGAGCG                   | 20                             | 45.7                        |
| CTX-M 38                             | TTTTTTTTTTTTTGAATTAGAGC <u>NG</u> CAGTCGG                     | 19                             | 55.8                        |
| CTX-M 77                             | TTTTTTTTTTTTTGTATG <u>ACC</u> NGACCCACGGT                     | 18                             | -                           |
| CTX-M 89                             | TTTTTTTTTTTTTGGCAACCA <u>ANT</u> CTGTAAA                      | 19                             | 42.0                        |
| CTX-M 106                            | TTTTTTTTTTTTTGTAACTAT <u>ANT</u> CCGATTGC                     | 20                             | 46.1                        |
| CTX-M 114                            | TTTTTTTTTTTTTAGCACGT <u>CNA</u> TGGAAACGA                     | 18                             | 49.7                        |
| CTX-M 119                            | TTTTTTTTTTTTTCGATGTC <u>CAN</u> GACTGAGC                      | 18                             | 47.3                        |
| CTX-M 140                            | TTTTTTTTTTTTTAAACTGAT <u>TNC</u> TACGTTGG                     | 20                             | 48.7                        |
| CTX-M 167.M1                         | TTTTTTTTTTTTTCCGTACCGAG <u>NC</u> AACGTTAA                    | 20                             | 52.9                        |
| CTX-M 239                            | TTTTTTTTTTTTTACCAGCAGC <u>NG</u> TGACTATG                     | 19                             | 51.5                        |
| CTX-M 240.M1                         | TTTTTTTTTTTTTGCAGCGGT <u>GNC</u> TATGG                        | 16                             | 53.1                        |
| CTX-M 278.M1                         | TTTTTTTTTTTTTAGCCATCGC <u>NA</u> TGTATTAG                     | 19                             | 47.6                        |
| CTX-M 288.M1                         | TTTTTTTTTTTTTAAATCGTCA <u>CCN</u> ACAGTTTGTA                  | 22                             | 47.2                        |
| probes specific for the CTX-M2 group |                                                               |                                |                             |
| CTX-M 48                             | TTTTTTTTTTTTTTCGCTGC <u>ACN</u> GATTAACACC                    | 20                             | -                           |
| CTX-M 61.1                           | TTTTTTTTTTTTTAAATCTCTAC <u>NGT</u> ACCGATGA                   | 21                             | -                           |
| CTX-M 61.2                           | TTTTTTTTTTTTTAAATCTCTAC <u>NTG</u> ACCGATGA                   | 21                             | -                           |
| CTX-M 99                             | TTTTTTTTTTTTTGAATCAA <u>AA</u> ANGAGCGACCTG                   | 22                             | 49.8                        |
| CTX-M 121.M2                         | TTTTTTTTTTTTTACGCTGGCT <u>NA</u> GCTTGGC                      | 18                             | 61.6                        |
| CTX-M 159                            | TTTTTTTTTTTTTGGTGATGAG <u>NC</u> CTCCGTCT                     | 20                             | 56.3                        |
| CTX-M 230                            | TTTTTTTTTTTTTCATCATGG <u>GN</u> AGTGGACGAT                    | 20                             | -                           |
| CTX-M 253                            | TTTTTTTTTTTTTATCTAGCC <u>AGN</u> AAACACGC                     | 20                             | -                           |
| CTX-M 274.M2                         | TTTTTTTTTTTTTACGGAA <u>AGN</u> CGTCGAGAT                      | 18                             | -                           |

| probe name                              | probe sequence(5'-3') <sup>a</sup>                      | length w/o spacer <sup>b</sup> | T <sub>M</sub> <sup>c</sup> |
|-----------------------------------------|---------------------------------------------------------|--------------------------------|-----------------------------|
| CTX-M 278.M2                            | TTTTTTTTTTTTTCGTCG <b>AGGAT</b> <u>NTT</u> CTGGCTG      | 20                             | 50.2                        |
| probes specific for the CTX-M8/25 group |                                                         |                                |                             |
| CTX-M 50                                | TTTTTTTTTTTTTGCTGATT <b>NAC</b> ACCTCC                  | 16                             | 43.2                        |
| CTX-M 55                                | TTTTTTTTTTTTTCTGATAAC <b>NC</b> ACAGACG                 | 17                             | 47.6                        |
| CTX-M 222                               | TTTTTTTTTTTTTCCAGCATT <b>CN</b> GGCT <b>AGC</b>         | 18                             | 51.2                        |
| CTX-M 274.M8                            | TTTTTTTTTTTTTAGTCAG <b>ANAG</b> TTGTCTG                 | 16                             | -                           |
| probes specific for the CTX-M9 group    |                                                         |                                |                             |
| CTX-M 7                                 | TTTTTTTTTTTTTCGGATGATG <b>TNC</b> AC <b>AGC</b> CGG     | 19                             | -                           |
| CTX-M 21                                | TTTTTTTTTTTTTTCGAGC <b>ACGN</b> CGCTTATG                | 18                             | 52.1                        |
| CTX-M 29                                | TTTTTTTTTTTTTACGAGTGCC <b>ANG</b> CAGCAAAGC             | 22                             | 59.6                        |
| CTX-M 52                                | TTTTTTTTTTTTTCATTGATAC <b>NC</b> AGATAATACG             | 22                             | 48.4                        |
| CTX-M 121.M9                            | TTTTTTTTTTTTTGTGCTGGCAG <b>AN</b> CTGA <b>ACGC</b>      | 18                             | 55.1                        |
| CTX-M 167.M9                            | TTTTTTTTTTTTTCA <b>CACT</b> GAA <b>NCT</b> ACGCTGA      | 19                             | 48.5                        |
| CTX-M 183                               | TTTTTTTTTTTTTCCACCAC <b>CGNCA</b> CG <b>AGC</b>         | 19                             | -                           |
| CTX-M 220.1                             | TTTTTTTTTTTTTGC <b>ACAGCC</b> <u>NG</u> CATT <b>CGG</b> | 17                             | 51.2                        |
| CTX-M 220.2                             | TTTTTTTTTTTTTGCAGCC <b>AGNA</b> TT <b>CGAGCC</b>        | 18                             | 55.3                        |
| CTX-M 231                               | TTTTTTTTTTTTTTCGTGGACT <b>GN</b> AGGTGATAAGA            | 22                             | 57.8                        |
| CTX-M 240.M9                            | TTTTTTTTTTTTTTCAGC <b>AGCGN</b> CTACGGCAC               | 19                             | 56.7                        |
| CTX-M 274.M9                            | TTTTTTTTTTTTTACGCAGAG <b>NGCC</b> ACCGC                 | 17                             | 55.4                        |
| CTX-M 288.M9                            | TTTTTTTTTTTTTAGAATCAT <b>CAC</b> <b>NAAG</b> AGCTGTAA   | 24                             | -                           |

<sup>a</sup> Sequence differences are highlighted bold. N assigns the position of the point mutation and is a substitution for A, G, C and T. The nucleotides, which encode the involved amino acid are displayed underlined.

<sup>b</sup> The probe length refers to the specific sequence involved in hybridization and does not take into account the 13-thymidine spacer.

<sup>c</sup> Melting temperatures (T<sub>M</sub>) were calculated with OligoAnalyzer (<http://eu.idtdna.com/analyzer/Applications/OligoAnalyzer/>). For probes with artificial mismatches, the T<sub>M</sub>-mismatch was calculated. For probes with more than one artificial mismatch the T<sub>M</sub>s could not be calculated and the probes were selected empirically.

Table S2 (supplementary material): Antibiotic susceptibility testing

a) MIC determination on a VITEK 2XL system using the Gram Negative Susceptibility Card AST-N062<sup>#</sup>. Numerical values are expressed in µg/ml. R, resistant; S, susceptible; I, intermediate; -, not tested. We did not consider the way the expert system of the VITEK interpreted or changed MICs.

| No <sup>a</sup> | Isolate        | ESBL <sup>b</sup> | PIP       | AMX/MEZ  | SAM/AMC  | TZP       | CFZ      | CXM      | CXM (axetil) | CPD     | CTX/CRO  | CAZ      | IMP     | MER        | TET/DOX  | GEN      | TOB/AMK  | SXT       | CIP        | LEV        | NIT      |
|-----------------|----------------|-------------------|-----------|----------|----------|-----------|----------|----------|--------------|---------|----------|----------|---------|------------|----------|----------|----------|-----------|------------|------------|----------|
| 24*             | <i>E.sak.</i>  | -                 | ≥128<br>R | ≥32<br>R | ≥32<br>R | ≤4<br>S   | ≥64<br>R | ≥64<br>R | ≥64<br>R     | ≥8<br>R | 4<br>S   | 32<br>R  | ≤1<br>S | ≤0.25<br>S | ≤1<br>S  | ≥16<br>R | 4<br>S   | ≥320<br>R | ≤0.25<br>S | ≤0.25<br>S | ≤16<br>S |
| 55*             | <i>K.oxy.</i>  | POS               | ≥128<br>R | ≥32<br>R | ≥32<br>R | ≥128<br>R | ≥64<br>R | ≥64<br>R | ≥64<br>R     | ≥8<br>R | 4<br>S   | 8<br>S   | ≤1<br>S | ≤0.25<br>S | ≥16<br>S | ≥16<br>R | ≥16<br>R | ≥320<br>R | ≤0.25<br>S | ≤0.25<br>S | 32<br>S  |
| 25*             | <i>K.spec.</i> | -                 | ≥128<br>R | ≥32<br>R | ≥32<br>R | 8<br>S    | ≥64<br>R | ≥64<br>R | ≥64<br>R     | ≥8<br>R | 16<br>I  | ≥64<br>R | ≤1<br>S | ≤0.25<br>S | 2<br>S   | ≤1<br>S  | ≥16<br>R | ≤20<br>S  | ≤0.25<br>S | ≤0.25<br>S | 128<br>R |
| 2 <sup>+</sup>  | <i>K.pneu.</i> | POS               | ≥128<br>R | ≥32<br>R | 16<br>I  | ≤4<br>S   | ≥64<br>R | 16<br>I  | 16<br>I      | ≥8<br>R | 16<br>I  | ≥64<br>R | ≤1<br>S | ≤0.25<br>S | 4<br>S   | ≥16<br>R | ≥16<br>R | ≥320<br>R | ≥4<br>R    | ≥8<br>R    | 128<br>R |
| 12 <sup>+</sup> | <i>K.pneu.</i> | POS               | ≥128<br>R | ≥32<br>R | 16<br>I  | ≤4<br>S   | ≥64<br>R | ≥64<br>R | ≥64<br>R     | ≥8<br>R | ≥64<br>R | ≥64<br>R | ≤1<br>S | ≤0.25<br>S | ≤1<br>S  | ≥16<br>R | ≥16<br>R | ≥320<br>R | 0.5<br>S   | 1<br>S     | 32<br>S  |
| 36 <sup>+</sup> | <i>K.pneu.</i> | POS               | ≥128<br>R | ≥32<br>R | ≥32<br>R | 8<br>S    | ≥64<br>R | ≥64<br>R | ≥64<br>R     | ≥8<br>R | 4<br>S   | ≥64<br>R | ≤1<br>S | ≤0.25<br>S | ≥16<br>R | ≥16<br>R | ≥16<br>R | ≥320<br>R | ≥4<br>R    | ≥8<br>R    | 64<br>I  |
| 1 <sup>+</sup>  | <i>K.ter.</i>  | -                 | ≥128<br>R | ≥32<br>R | ≥32<br>R | ≤4<br>S   | ≥64<br>R | 16<br>I  | 16<br>I      | ≥8<br>R | 32<br>I  | ≥64<br>R | ≤1<br>S | ≤0.25<br>S | 4<br>S   | ≥16<br>R | ≥16<br>R | ≥320<br>R | ≥4<br>R    | ≥8<br>R    | 128<br>R |
| 15 <sup>+</sup> | <i>K.ter.</i>  | -                 | ≥128<br>R | ≥32<br>R | ≥32<br>R | ≤4<br>S   | ≥64<br>R | 16<br>I  | 16<br>I      | ≥8<br>R | 32<br>I  | ≥64<br>R | ≤1<br>S | ≤0.25<br>S | ≤1<br>S  | ≥16<br>R | ≥16<br>R | ≥320<br>R | ≤0.25<br>S | 0.5<br>S   | 128<br>R |
| 17 <sup>+</sup> | <i>K.ter.</i>  | -                 | ≥128<br>R | ≥32<br>R | ≥32<br>R | 16<br>S   | ≥64<br>R | ≥64<br>R | ≥64<br>R     | ≥8<br>R | ≥64<br>R | ≥64<br>R | ≤1<br>S | ≤0.25<br>S | ≤1<br>S  | ≥16<br>R | 8<br>I   | ≥320<br>I | 1<br>S     | 1<br>S     | 64<br>I  |
| 52*             | <i>K.oxy.</i>  | POS               | ≥128<br>R | ≥32<br>R | ≥32<br>R | 8<br>S    | ≥64<br>R | ≥64<br>R | ≥64<br>R     | ≥8<br>R | 32<br>I  | ≥64<br>R | ≤1<br>S | ≤0.25<br>S | 8<br>I   | ≥16<br>R | ≥16<br>S | ≥320<br>R | 1<br>S     | 2<br>S     | 128<br>R |
| 5 <sup>+</sup>  | <i>E.coli</i>  | POS               | 16<br>S   | ≥32<br>R | 4<br>S   | ≤4<br>S   | ≥64<br>R | 8<br>S   | 8<br>I       | ≥8<br>R | ≤1<br>S  | ≥64<br>R | ≤1<br>S | ≤0.25<br>S | ≥16<br>R | ≤1<br>S  | ≤1<br>S  | ≤20<br>S  | ≤0.25<br>S | ≤0.25<br>S | ≤16<br>S |
| 19 <sup>+</sup> | <i>K.pneu.</i> | POS               | ≥128<br>R | ≥32<br>R | 16<br>I  | ≤4<br>S   | ≥64<br>R | ≥64<br>R | ≥64<br>R     | ≥8<br>R | ≥64<br>R | ≥64<br>R | ≤1<br>S | ≤0.25<br>S | 2<br>S   | ≤1<br>S  | ≤1<br>S  | ≤20<br>S  | ≤0.25<br>S | ≤0.25<br>S | 128<br>R |
| 49*             | <i>K.spec.</i> | -                 | ≥128<br>R | ≥32<br>R | ≥32<br>R | 64<br>I   | ≥64<br>R | ≥64<br>R | ≥64<br>R     | ≥8<br>R | ≥64<br>R | ≥64<br>R | ≤1<br>S | ≤0.25<br>S | ≥16<br>R | ≥16<br>R | ≥16<br>R | ≥320<br>R | ≥4<br>R    | ≥8<br>R    | 256<br>R |
| 13 <sup>+</sup> | <i>E.coli</i>  | POS               | ≥128<br>R | ≥32<br>R | ≥32<br>R | 8<br>S    | ≥64<br>R | ≥64<br>R | ≥64<br>R     | ≥8<br>R | ≥64<br>R | 16<br>I  | ≤1<br>S | ≤0.25<br>S | ≥16<br>R | 2<br>S   | ≥16<br>R | ≤20<br>S  | ≥4<br>R    | ≥8<br>R    | ≤16<br>S |
| 18 <sup>+</sup> | <i>E.coli</i>  | POS               | ≥128<br>R | ≥32<br>R | ≥32<br>R | ≤4<br>S   | ≥64<br>R | ≥64<br>R | ≥64<br>R     | ≥8<br>R | ≥64<br>R | ≥64<br>R | ≤1<br>S | ≤0.25<br>S | ≥16<br>R | ≤1<br>S  | ≤1<br>S  | ≥320<br>S | ≤0.25<br>S | ≤0.25<br>S | ≤16<br>S |
| 20*             | <i>E.coli</i>  | POS               | ≥128<br>R | ≥32<br>R | ≥32<br>R | ≤4<br>S   | ≥64<br>R | ≥64<br>R | ≥64<br>R     | ≥8<br>R | ≥64<br>R | 16<br>I  | ≤1<br>S | ≤0.25<br>S | 2<br>S   | 2<br>S   | ≤1<br>S  | ≤20<br>S  | ≥4<br>S    | ≥8<br>S    | ≤16<br>S |
| 26 <sup>+</sup> | <i>E.coli</i>  | POS               | ≥128<br>R | ≥32<br>R | ≥32<br>R | 8<br>S    | ≥64<br>R | ≥64<br>R | ≥64<br>R     | ≥8<br>R | ≥64<br>R | 16<br>I  | ≤1<br>S | ≤0.25<br>S | ≥16<br>R | 2<br>S   | ≥16<br>R | ≥320<br>R | ≥4<br>R    | ≥8<br>R    | ≤16<br>S |
| 33*             | <i>E.coli</i>  | NEG               | ≥128<br>R | ≥32<br>R | ≥32<br>R | 32<br>I   | ≥64<br>R | ≥64<br>R | ≥64<br>R     | ≥8<br>R | ≥64<br>R | 32<br>R  | ≤1<br>S | ≤0.25<br>S | ≥16<br>S | 2<br>R   | ≥16<br>R | ≤20<br>S  | ≥4<br>R    | ≥8<br>R    | ≤16<br>S |
| 38 <sup>+</sup> | <i>E.coli</i>  | POS               | ≥128<br>R | ≥32<br>R | ≥32<br>R | ≥128<br>R | ≥64<br>R | ≥64<br>R | ≥64<br>R     | ≥8<br>R | ≥64<br>R | ≥64<br>R | ≤1<br>S | ≤0.25<br>S | ≥16<br>R | ≥16<br>R | ≥16<br>R | ≥320<br>R | ≥4<br>R    | ≥8<br>R    | ≤16<br>S |
| 40 <sup>+</sup> | <i>E.coli</i>  | POS               | ≥128<br>R | ≥32<br>R | ≥32<br>R | 8<br>S    | ≥64<br>R | ≥64<br>R | ≥64<br>R     | ≥8<br>R | ≥64<br>R | 16<br>I  | ≤1<br>S | ≤0.25<br>S | ≥16<br>R | ≥16<br>R | ≥16<br>R | ≥320<br>R | ≥4<br>R    | ≥8<br>R    | 64<br>I  |
| 48*             | <i>E.coli</i>  | POS               | ≥128<br>R | ≥32<br>R | ≥32<br>R | 8<br>S    | ≥64<br>R | ≥64<br>R | ≥64<br>R     | ≥8<br>R | ≥64<br>R | 16<br>I  | ≤1<br>S | ≤0.25<br>S | ≥16<br>R | 2<br>S   | ≥16<br>R | ≤20<br>S  | ≥4<br>R    | ≥8<br>R    | ≤16<br>S |
| 60 <sup>+</sup> | <i>E.coli</i>  | POS               | ≥128<br>R | ≥32<br>R | ≥32<br>R | 8<br>S    | ≥64<br>R | ≥64<br>R | ≥64<br>R     | ≥8<br>R | ≥64<br>R | 16<br>I  | ≤1<br>S | ≤0.25<br>S | ≥16<br>R | ≥16<br>R | ≥16<br>R | ≥320<br>R | ≥4<br>R    | ≥8<br>R    | 64<br>I  |
| 61 <sup>+</sup> | <i>E.coli</i>  | POS               | ≥128<br>R | ≥32<br>R | ≥32<br>R | ≤4<br>S   | ≥64<br>R | ≥64<br>R | ≥64<br>R     | ≥8<br>R | ≥64<br>R | ≥64<br>R | ≤1<br>S | ≤0.25<br>S | ≤1<br>S  | ≤1<br>S  | ≤1<br>S  | ≥320<br>R | ≥4<br>R    | ≥8<br>R    | ≤16<br>S |
| 6 <sup>+</sup>  | <i>E.coli</i>  | POS               | ≥128<br>R | ≥32<br>R | ≥32<br>R | 8<br>S    | ≥64<br>R | ≥64<br>R | ≥64<br>R     | ≥8<br>R | ≥64<br>R | 16<br>I  | ≤1<br>S | ≤0.25<br>S | ≥16<br>R | ≥16<br>R | ≥16<br>R | ≥320<br>R | ≥4<br>R    | ≥8<br>R    | 64<br>I  |
| 9 <sup>+</sup>  | <i>E.coli</i>  | POS               | ≥128<br>R | ≥32<br>R | ≥32<br>R | 64<br>I   | ≥64<br>R | ≥64<br>R | ≥64<br>R     | ≥8<br>R | ≥64<br>R | ≥64<br>R | ≤1<br>S | ≤0.25<br>S | ≥16<br>R | ≥16<br>R | ≥16<br>R | ≥320<br>R | ≥4<br>R    | ≥8<br>R    | ≤16<br>S |
| 30*             | <i>E.coli</i>  | POS               | ≥128<br>R | ≥32<br>R | ≥32<br>R | 8<br>S    | ≥64<br>R | ≥64<br>R | ≥64<br>R     | ≥8<br>R | ≥64<br>R | 16<br>I  | ≤1<br>S | ≤0.25<br>S | ≥16<br>R | ≥16<br>R | ≥16<br>R | ≤20<br>S  | ≥4<br>R    | ≥8<br>R    | ≤16<br>S |
| 32*             | <i>E.coli</i>  | POS               | ≥128<br>R | ≥32<br>R | ≥32<br>R | 8<br>S    | ≥64<br>R | ≥64<br>R | ≥64<br>R     | ≥8<br>R | ≥64<br>R | 16<br>I  | ≤1<br>S | ≤0.25<br>S | ≥16<br>R | ≥16<br>R | ≥16<br>R | ≥320<br>R | ≥4<br>R    | ≥8<br>R    | ≤16<br>S |
| 34 <sup>+</sup> | <i>E.coli</i>  | POS               | ≥128<br>R | ≥32<br>R | ≥32<br>R | ≤4<br>S   | ≥64<br>R | ≥64<br>R | ≥64<br>R     | ≥8<br>R | ≥64<br>R | 16<br>I  | ≤1<br>S | ≤0.25<br>S | ≤1<br>S  | ≤1<br>S  | ≤1<br>S  | ≤20<br>S  | ≥4<br>R    | ≥8<br>R    | ≤16<br>S |
| 57 <sup>+</sup> | <i>E.coli</i>  | POS               | ≥128<br>R | ≥32<br>R | ≥32<br>R | 8<br>S    | ≥64<br>R | ≥64<br>R | ≥64<br>R     | ≥8<br>R | ≥64<br>R | 16<br>I  | ≤1<br>S | ≤0.25<br>S | ≥16<br>R | ≥16<br>R | ≥16<br>R | ≥320<br>R | ≤0.25<br>S | ≤0.25<br>S | ≤16<br>S |

| No <sup>a</sup> | Isolate        | ESBL <sup>b</sup> | PIP       | AMX/MEZ  | SAM/AMC  | TZP     | CFZ      | CXM      | CXM (axetil) | CPD     | CTX/CRO  | CAZ      | IMP     | MER        | TET/DOX  | GEN      | TOB/AMK  | SXT       | CIP        | LEV        | NIT      |
|-----------------|----------------|-------------------|-----------|----------|----------|---------|----------|----------|--------------|---------|----------|----------|---------|------------|----------|----------|----------|-----------|------------|------------|----------|
| 3 <sup>+</sup>  | <i>E.int.</i>  | -                 | ≥128<br>R | ≥32<br>R | ≥32<br>R | 8<br>S  | ≥64<br>R | ≥64<br>R | ≥64<br>R     | ≥8<br>R | ≥64<br>R | ≥64<br>R | ≤1<br>S | ≤0.25<br>S | ≥16<br>R | ≤1<br>S  | ≥16<br>R | ≤20<br>S  | ≥4<br>R    | ≥8<br>R    | 64<br>I  |
| 29 <sup>+</sup> | <i>K.oxy.</i>  | POS               | ≥128<br>R | ≥32<br>R | ≥32<br>R | 64<br>I | ≥64<br>R | ≥64<br>R | ≥64<br>R     | ≥8<br>R | ≥64<br>R | ≥64<br>R | ≤1<br>S | ≤0.25<br>S | ≥16<br>R | ≥16<br>R | ≥16<br>R | ≥320<br>R | ≥4<br>R    | ≥8<br>R    | 256<br>R |
| 7 <sup>+</sup>  | <i>K.pneu.</i> | POS               | ≥128<br>R | ≥32<br>R | ≥32<br>R | 8<br>S  | ≥64<br>R | ≥64<br>R | ≥64<br>R     | ≥8<br>R | ≥64<br>S | 16<br>I  | ≤1<br>S | ≤0.25<br>S | 8<br>I   | ≥16<br>R | 8<br>R   | ≥320<br>R | ≥4<br>R    | ≥8<br>R    | 64<br>I  |
| 16 <sup>+</sup> | <i>K.pneu.</i> | POS               | ≥128<br>R | ≥32<br>R | ≥32<br>R | 8<br>S  | ≥64<br>R | ≥64<br>R | ≥64<br>R     | ≥8<br>R | ≥64<br>R | ≥64<br>R | ≤1<br>S | ≤0.25<br>S | ≥16<br>R | ≥16<br>R | ≥16<br>R | ≥320<br>R | ≥4<br>R    | ≥8<br>R    | 256<br>R |
| 37 <sup>+</sup> | <i>K.pneu.</i> | POS               | ≥128<br>R | ≥32<br>R | ≥32<br>R | 32<br>I | ≥64<br>R | ≥64<br>R | ≥64<br>R     | ≥8<br>R | ≥64<br>R | ≥64<br>R | ≤1<br>S | ≤0.25<br>S | ≥16<br>R | ≥16<br>R | ≥16<br>R | ≥320<br>R | ≤0.25<br>S | ≤0.25<br>S | 32<br>S  |
| 10 <sup>+</sup> | <i>K.pneu.</i> | POS               | ≥128<br>R | ≥32<br>R | ≥32<br>R | 4<br>S  | ≥64<br>R | ≥64<br>R | ≥64<br>R     | ≥8<br>R | ≥64<br>R | ≥64<br>R | ≤1<br>S | ≤0.25<br>S | 2<br>S   | ≥16<br>R | ≥16<br>R | ≤20<br>S  | ≤0.25<br>S | ≤0.25<br>S | 32<br>S  |
| 35 <sup>+</sup> | <i>K.pneu.</i> | POS               | ≥128<br>R | ≥32<br>R | ≥32<br>R | 32<br>I | ≥64<br>R | ≥64<br>R | ≥64<br>R     | ≥8<br>R | ≥64<br>R | ≥64<br>R | ≤1<br>S | ≤0.25<br>S | ≥16<br>R | ≥16<br>R | ≥16<br>R | ≥320<br>R | ≥4<br>R    | ≥8<br>R    | 256<br>R |
| 42 <sup>+</sup> | <i>K.pneu.</i> | POS               | ≥128<br>R | ≥32<br>R | ≥32<br>R | 64<br>I | ≥64<br>R | ≥64<br>R | ≥64<br>R     | ≥8<br>R | ≥64<br>R | ≥64<br>R | ≤1<br>S | ≤0.25<br>S | ≥16<br>R | ≥16<br>R | ≥16<br>R | ≥320<br>R | ≥4<br>R    | ≥8<br>R    | 256<br>R |
| 11 <sup>+</sup> | <i>K.pneu.</i> | POS               | ≥128<br>R | ≥32<br>R | ≥32<br>R | 8<br>S  | ≥64<br>R | ≥64<br>R | ≥64<br>R     | ≥8<br>R | ≥64<br>R | 16<br>I  | ≤1<br>S | ≤0.25<br>S | ≥16<br>R | ≥16<br>R | ≥16<br>R | ≥320<br>R | 2<br>I     | 1<br>S     | 64<br>I  |
| 22 <sup>*</sup> | <i>K.pneu.</i> | POS               | ≥128<br>R | ≥32<br>R | ≥32<br>R | 64<br>I | ≥64<br>R | ≥64<br>R | ≥64<br>R     | ≥8<br>R | ≥64<br>R | ≥64<br>R | ≤1<br>S | ≤0.25<br>S | ≥16<br>R | ≥16<br>R | ≥16<br>R | 40<br>S   | ≥4<br>R    | ≥8<br>R    | 512<br>R |
| 50 <sup>*</sup> | <i>K.pneu.</i> | POS               | ≥128<br>R | ≥32<br>R | ≥32<br>R | 8<br>S  | ≥64<br>R | ≥64<br>R | ≥64<br>R     | ≥8<br>R | ≥64<br>R | ≥64<br>R | ≤1<br>S | ≤0.25<br>S | ≥16<br>R | ≥16<br>R | ≥16<br>R | ≥320<br>R | ≥4<br>R    | ≥8<br>R    | 256<br>R |
| 14 <sup>+</sup> | <i>K.ter.</i>  | -                 | ≥128<br>R | ≥32<br>R | ≥32<br>R | 32<br>I | ≥64<br>R | ≥64<br>R | ≥64<br>R     | ≥8<br>R | ≥64<br>R | ≥64<br>R | ≤1<br>S | ≤0.25<br>S | ≥16<br>R | ≥16<br>R | ≥16<br>R | ≤20<br>S  | ≤0.25<br>S | 0.5<br>S   | 32<br>S  |
| 28 <sup>+</sup> | <i>K.ter.</i>  | -                 | ≥128<br>R | ≥32<br>R | ≥32<br>R | 64<br>I | ≥64<br>R | ≥64<br>R | ≥64<br>R     | ≥8<br>R | ≥64<br>R | ≥64<br>R | ≤1<br>S | ≤0.25<br>S | ≥16<br>R | ≥16<br>R | ≥16<br>R | ≥320<br>R | ≥4<br>R    | ≥8<br>R    | 256<br>R |
| 21 <sup>*</sup> | <i>K.ter.</i>  | -                 | ≥128<br>R | ≥32<br>R | ≥32<br>R | 32<br>I | ≥64<br>R | ≥64<br>R | ≥64<br>R     | ≥8<br>R | ≥64<br>R | ≥64<br>R | ≤1<br>S | ≤0.25<br>S | ≥16<br>R | ≥16<br>R | ≥16<br>R | ≥320<br>R | ≥4<br>R    | ≥8<br>R    | 256<br>R |
| 51 <sup>*</sup> | <i>K.spec.</i> | -                 | ≥128<br>R | ≥32<br>R | ≥32<br>R | 64<br>I | ≥64<br>R | ≥64<br>R | ≥64<br>R     | ≥8<br>R | ≥64<br>R | ≥64<br>R | ≤1<br>S | ≤0.25<br>S | ≥16<br>R | ≥16<br>R | ≥16<br>R | ≥320<br>R | ≥4<br>R    | ≥8<br>R    | 256<br>R |
| 8 <sup>+</sup>  | <i>E.coli</i>  | POS               | ≥128<br>R | ≥32<br>R | ≥32<br>R | ≤4<br>S | ≥64<br>R | ≥64<br>R | ≥64<br>R     | ≥8<br>R | 32<br>I  | 4<br>S   | ≤1<br>S | ≤0.25<br>S | ≤1<br>S  | ≤1<br>S  | ≤1<br>S  | ≥320<br>R | ≤0.25<br>S | ≤0.25<br>S | 32<br>S  |
| 56 <sup>*</sup> | <i>E.coli</i>  | POS               | ≥128<br>R | ≥32<br>R | 16<br>I  | ≤4<br>S | ≥64<br>R | ≥64<br>R | ≥64<br>R     | ≥8<br>R | 16<br>I  | ≤1<br>S  | ≤1<br>S | ≤0.25<br>S | ≥16<br>R | 4<br>S   | 2<br>S   | ≤20<br>S  | ≤0.25<br>S | ≤0.25<br>S | ≤16<br>S |
| 59 <sup>+</sup> | <i>E.coli</i>  | POS               | ≥128<br>R | ≥32<br>R | ≥32<br>R | 8<br>S  | ≥64<br>R | ≥64<br>R | ≥64<br>R     | ≥8<br>R | ≥64<br>R | ≥64<br>R | ≤1<br>S | ≤0.25<br>S | ≥16<br>R | ≥16<br>R | ≥16<br>R | ≥320<br>R | ≥4<br>R    | ≥8<br>R    | 64<br>I  |
| 27 <sup>+</sup> | <i>E.coli</i>  | POS               | ≥128<br>R | ≥32<br>R | ≥32<br>R | 32<br>I | ≥64<br>R | ≥64<br>R | ≥64<br>R     | ≥8<br>R | ≥64<br>R | ≥64<br>R | ≤1<br>S | ≤0.25<br>S | ≥16<br>R | ≥16<br>R | ≥16<br>R | ≥320<br>R | ≥4<br>R    | ≥8<br>R    | 64<br>I  |
| 4 <sup>+</sup>  | <i>E.coli</i>  | POS               | ≥128<br>R | ≥32<br>R | ≥32<br>R | ≤4<br>S | ≥64<br>R | ≥64<br>R | ≥64<br>R     | ≥8<br>R | ≥64<br>R | ≤1<br>S  | ≤1<br>S | ≤0.25<br>S | ≥16<br>R | ≥16<br>R | 8<br>I   | ≥320<br>R | ≥4<br>R    | ≥8<br>R    | ≤16<br>S |
| 39 <sup>+</sup> | <i>E.coli</i>  | POS               | ≥128<br>R | ≥32<br>R | ≥32<br>R | ≤4<br>S | ≥64<br>R | ≥64<br>R | ≥64<br>R     | ≥8<br>R | ≥64<br>R | ≤1<br>S  | ≤1<br>S | ≤0.25<br>S | ≥16<br>R | ≥16<br>R | 8<br>I   | ≤20<br>S  | ≥4<br>R    | ≥8<br>R    | ≤16<br>S |
| 58 <sup>+</sup> | <i>E.coli</i>  | POS               | ≥128<br>R | ≥32<br>R | ≥32<br>R | ≤4<br>S | ≥64<br>R | ≥64<br>R | ≥64<br>R     | ≥8<br>R | ≥64<br>R | ≤1<br>S  | ≤1<br>S | ≤0.25<br>S | ≥16<br>R | ≤1<br>S  | ≤1<br>S  | ≤20<br>S  | ≤0.25<br>S | ≤0.25<br>S | ≤16<br>S |
| 46 <sup>*</sup> | <i>E.coli</i>  | POS               | 32<br>I   | ≥32<br>R | ≥32<br>R | ≤4<br>S | ≥64<br>R | ≥64<br>R | ≥64<br>R     | ≥8<br>R | 4<br>S   | ≥64<br>R | ≤1<br>S | ≤0.25<br>S | ≥16<br>R | ≥16<br>R | ≥16<br>R | ≥320<br>R | ≥4<br>R    | ≥8<br>R    | ≤16<br>S |
| 41 <sup>+</sup> | <i>E.coli</i>  | POS               | ≥128<br>R | ≥32<br>R | ≥32<br>R | ≤4<br>S | ≥64<br>R | ≥64<br>R | ≥64<br>R     | ≥8<br>R | ≥64<br>R | 4<br>S   | ≤1<br>S | ≤0.25<br>S | 2<br>S   | ≥16<br>R | ≥16<br>R | ≥320<br>R | ≥4<br>R    | ≥8<br>R    | 32<br>S  |
| 47 <sup>+</sup> | <i>P.vul.</i>  | -                 | -         | -        | -        | -       | -        | -        | -            | -       | -        | -        | -       | -          | -        | -        | -        | -         | -          | -          | -        |
| 44 <sup>*</sup> | <i>E.coli</i>  | POS               | 64<br>I   | ≥32<br>R | ≥32<br>R | ≤4<br>S | ≥64<br>R | ≥64<br>R | ≥64<br>R     | ≥8<br>R | 32<br>I  | ≥64<br>R | ≤1<br>S | ≤0.25<br>S | ≥16<br>R | ≥16<br>R | ≥16<br>R | ≥320<br>R | ≥4<br>R    | ≥8<br>R    | ≤16<br>S |
| 53 <sup>*</sup> | <i>E.coli</i>  | POS               | ≥128<br>R | ≥32<br>R | ≥32<br>R | 16<br>S | ≥64<br>R | ≥64<br>R | ≥64<br>R     | ≥8<br>R | ≥64<br>R | 16<br>I  | ≤1<br>S | ≤0.25<br>S | ≥16<br>R | ≥16<br>R | ≥16<br>R | ≥320<br>R | ≥4<br>R    | ≥8<br>R    | 64<br>I  |
| 31 <sup>*</sup> | <i>E.coli</i>  | POS               | 64<br>I   | ≥32<br>R | ≥32<br>R | ≤4<br>S | ≥64<br>R | ≥64<br>R | ≥64<br>R     | ≥8<br>R | 32<br>I  | ≥64<br>R | ≤1<br>S | ≤0.25<br>S | ≥16<br>R | ≥16<br>R | ≥16<br>R | ≥320<br>R | ≥4<br>R    | ≥8<br>R    | ≤16<br>S |
| 54 <sup>*</sup> | <i>C.freu.</i> | -                 | ≥128<br>R | ≥32<br>R | ≥32<br>R | 64<br>I | ≥64<br>R | ≥64<br>R | ≥64<br>R     | ≥8<br>R | 32<br>I  | ≥64<br>R | ≤1<br>S | ≤0.25<br>S | ≤1<br>S  | ≤1<br>S  | ≤1<br>S  | ≤20<br>S  | ≤0.25<br>S | ≤0.25<br>S | 32<br>S  |
| 62 <sup>*</sup> | <i>K.pneu.</i> | -                 | -         | -        | -        | -       | -        | -        | -            | -       | -        | -        | -       | -          | -        | -        | -        | -         | -          | -          | -        |
| 23 <sup>*</sup> | <i>R.aqu.</i>  | -                 | ≤4<br>S   | ≥32<br>R | ≤2<br>S  | ≤4<br>S | 32<br>R  | 32<br>R  | 32<br>R      | ≥8<br>R | ≤1<br>S  | ≤1<br>S  | ≤1<br>S | ≤0.25<br>S | 2<br>S   | ≤1<br>S  | ≤1<br>S  | ≤20<br>S  | ≤0.25<br>S | 0.25<br>S  | ≤16<br>S |

<sup>#</sup> MIC testing was performed at the Robert-Bosch-Hospital in Stuttgart, Germany

<sup>a</sup> For better comparison the data was sorted as in Table 1. Samples originally collected in <sup>+</sup> Frankfurt and <sup>\*</sup> Stuttgart.

<sup>b</sup> The VITEK ESBL test is FDA approved only for *E. coli*, *K. pneumoniae* and *K. oxytoca*.

b) Susceptibility testing according to CLSI standards at the Institute of Medical Microbiology and Hygiene, J.W. Goethe-Universität, Frankfurt am Main, Germany. R, resistant; S, susceptible; I, intermediate; -, not tested.

| No <sup>a</sup> | Isolate        | AMX/MEZ | AMC | PIP | TZP | CEC/CFZ | CXM | FOX | CTX | CRO | CAZ | FEP | IMP | MER | GEN/TOB | AMK | DOX | SXT | FOF | LEV/CIP/MXF | Colistin |
|-----------------|----------------|---------|-----|-----|-----|---------|-----|-----|-----|-----|-----|-----|-----|-----|---------|-----|-----|-----|-----|-------------|----------|
| 2               | <i>K.pneu.</i> | R/R     | S   | R   | I   | R/R     | R   | R   | R   | R   | R   | R   | S   | S   | R/R     | S   | S   | R   | S   | R/I/R       | S        |
| 12              | <i>K.pneu.</i> | R/R     | R   | R   | I   | R/R     | R   | R   | R   | R   | R   | R   | S   | S   | R/R     | S   | S   | R   | S   | S/S/S       | S        |
| 36              | <i>K.pneu.</i> | R/R     | R   | R   | S   | R/R     | R   | S   | R   | R   | R   | R   | S   | S   | R/R     | S   | R   | R   | R   | R/R/R       | S-       |
| 1               | <i>K.ter.</i>  | R/R     | I   | R   | I   | R/R     | R   | S   | R   | R   | R   | R   | S   | S   | R/R     | S   | I   | R   | R   | I/I/R       | S        |
| 15              | <i>K.ter.</i>  | R/R     | R   | R   | R   | R/R     | R   | S   | R   | R   | R   | R   | S   | S   | R/R     | R   | R   | S   | R   | S/S/S       | S        |
| 17              | <i>K.ter.</i>  | R/R     | R   | R   | S   | R/R     | R   | R   | R   | R   | R   | R   | S   | S   | R/R     | S   | S   | R   | S   | S/S/S       | S        |
| 5               | <i>E.coli</i>  | R/R     | R   | R   | S   | R/R     | R   | R   | R   | R   | R   | R   | S   | S   | S/S     | S   | R   | R   | S   | S/S/S       | S        |
| 19              | <i>K.pneu.</i> | R/R     | R   | R   | R   | R/R     | R   | S   | R   | R   | R   | R   | S   | S   | S/S     | S   | S   | S   | S   | S/S/S       | S        |
| 13              | <i>E.coli</i>  | R/R     | R   | R   | R   | R/R     | R   | S   | R   | R   | R   | R   | S   | S   | S/S     | S   | R   | R   | S   | S/S/S       | S        |
| 18              | <i>E.coli</i>  | R/R     | I   | R   | S   | R/R     | R   | R   | R   | R   | R   | R   | S   | S   | S/S     | S   | R   | S   | S   | S/S/S       | S        |
| 26              | <i>E.coli</i>  | R/R     | R   | R   | R   | R/R     | R   | S   | R   | R   | R   | R   | S   | S   | S/R     | S   | R   | R   | S   | R/R/R       | S        |
| 38              | <i>E.coli</i>  | R/R     | R   | R   | R   | R/R     | R   | S   | R   | R   | R   | R   | S   | S   | R/R     | R   | R   | R   | S   | R/R/R       | S        |
| 40              | <i>E.coli</i>  | R/R     | R   | R   | S   | R/R     | R   | S   | R   | R   | R   | R   | S   | S   | S/S     | S   | R   | S   | S   | S/S/S       | S        |
| 60              | <i>E.coli</i>  | R/R     | R   | R   | I   | R/R     | R   | S   | R   | R   | R   | R   | S   | S   | R/R     | S   | R   | R   | R   | R/R/R       | S        |
| 61              | <i>E.coli</i>  | R/R     | R   | R   | R   | R/R     | R   | S   | R   | R   | R   | R   | S   | S   | S/S     | S   | S   | S   | R   | R/R/R       | S        |
| 6               | <i>E.coli</i>  | R/R     | R   | R   | R   | R/R     | R   | R   | R   | R   | R   | R   | S   | S   | R/R     | S   | R   | R   | S   | R/R/R       | S        |
| 9               | <i>E.coli</i>  | R/R     | R   | R   | S   | R/R     | R   | R   | R   | R   | R   | R   | S   | S   | R/R     | S   | R   | R   | S   | R/R/R       | S        |
| 34              | <i>E.coli</i>  | R/R     | R   | R   | S   | R/R     | R   | S   | R   | R   | R   | R   | S   | S   | S/S     | S   | R   | R   | S   | R/R/R       | S        |
| 57              | <i>E.coli</i>  | R/R     | R   | R   | S   | R/R     | R   | S   | R   | R   | R   | R   | S   | S   | R/R     | S   | R   | R   | S   | S/S/S       | S        |
| 3               | <i>E.int.</i>  | R/R     | R   | R   | R   | R/R     | R   | R   | R   | R   | R   | R   | S   | S   | S/R     | S   | S   | S   | S   | S/S/S       | S        |
| 29              | <i>K.oxy.</i>  | R/R     | R   | R   | R   | R/R     | R   | S   | R   | R   | R   | R   | S   | S   | R/R     | S   | R   | R   | I   | R/R/R       | S        |
| 7               | <i>K.pneu.</i> | R/R     | R   | R   | R   | R/R     | R   | R   | R   | R   | R   | R   | S   | S   | R/R     | S   | R   | R   | S   | R/R/R       | S        |
| 16              | <i>K.pneu.</i> | R/R     | R   | R   | R   | R/R     | R   | S   | R   | R   | R   | R   | S   | S   | R/R     | R   | R   | R   | R   | R/R/R       | S        |
| 37              | <i>K.pneu.</i> | R/R     | R   | R   | R   | R/R     | R   | S   | R   | R   | R   | R   | S   | S   | R/R     | S   | R   | R   | R   | S/S/S       | S        |
| 10              | <i>K.pneu.</i> | R/R     | R   | R   | S   | R/R     | R   | S   | R   | R   | R   | R   | S   | S   | R/R     | R   | R   | R   | R   | S/S/S       | -        |
| 35              | <i>K.pneu.</i> | R/R     | R   | R   | R   | R/R     | R   | S   | R   | R   | R   | R   | S   | S   | R/R     | S   | R   | R   | S   | R/R/R       | S        |
| 42              | <i>K.pneu.</i> | R/R     | R   | R   | R   | R/R     | R   | S   | R   | R   | R   | R   | S   | S   | R/R     | S   | R   | R   | S   | R/R/R       | S        |
| 11              | <i>K.pneu.</i> | R/R     | R   | R   | S   | R/R     | R   | S   | R   | R   | R   | R   | S   | S   | R/R     | S   | R   | R   | S   | I/I/I       | S        |
| 14              | <i>K.ter.</i>  | R/R     | R   | R   | S   | R/R     | R   | S   | R   | R   | R   | R   | S   | S   | R/R     | R   | S   | R   | S   | S/S/S       | S        |
| 28              | <i>K.ter.</i>  | R/R     | R   | R   | S   | R/R     | R   | S   | R   | R   | R   | R   | S   | S   | R/R     | S   | R   | R   | S   | R/R/R       | S        |
| 8               | <i>E.coli</i>  | R/R     | R   | R   | R   | R/R     | R   | R   | R   | R   | R   | R   | S   | S   | S/S     | S   | S   | S   | S   | S/S/S       | S        |
| 59              | <i>E.coli</i>  | R/R     | R   | R   | R   | R/R     | R   | S   | R   | R   | R   | R   | S   | S   | R/R     | S   | R   | R   | S   | R/R/R       | S        |
| 27              | <i>E.coli</i>  | R/R     | R   | R   | R   | R/R     | R   | S   | R   | R   | R   | R   | S   | S   | R/R     | S   | R   | R   | R   | R/R/R       | S        |
| 4               | <i>E.coli</i>  | R/R     | R   | R   | S   | R/R     | R   | S   | R   | R   | R   | R   | S   | S   | R/R     | S   | R   | R   | S   | R/R/R       | S        |
| 39              | <i>E.coli</i>  | R/R     | R   | R   | S   | R/R     | R   | S   | R   | R   | R   | R   | S   | S   | R/R     | S   | R   | R   | S   | R/R/R       | S        |
| 58              | <i>E.coli</i>  | R/R     | R   | R   | R   | R/R     | R   | S   | R   | R   | R   | R   | S   | S   | S/S     | S   | R   | S   | S   | S/S/S       | S        |
| 41              | <i>E.coli</i>  | R/R     | R   | R   | S   | R/R     | R   | S   | R   | R   | R   | R   | S   | S   | R/R     | -   | I   | R   | R   | R/R/R       | S        |
| 47              | <i>P.vul.</i>  | R/R     | R   | R   | S   | R/R     | R   | S   | R   | R   | R   | R   | S   | S   | R/R     | S   | R   | S   | R   | S/S/S       | R        |

<sup>a</sup> For better comparison the data was also sorted for different genotypes detected and afterwards clustered for species.

c) Susceptibility testing according to CLSI standards at the Department of Laboratory Medicine, Robert-Bosch-Hospital, Stuttgart, Germany. R, resistant; S, susceptible; I, intermediate; -, not tested.

| No <sup>a</sup> | Isolate        | AMX/MEZ | AMC | PIP | TZP/PIP-SUL | CFZ | CXM | CPD | CTX | CRO | CAZ | FEP | IMP | FOX | Aztreonam | GEN/TOB | AMK | DOX | SXT | FOF | LEV/CIP |
|-----------------|----------------|---------|-----|-----|-------------|-----|-----|-----|-----|-----|-----|-----|-----|-----|-----------|---------|-----|-----|-----|-----|---------|
| 24              | <i>E.sak.</i>  | R/R     | R   | R   | S           | R   | R   | R   | I   | I   | I   | S   | S   | -   | -         | R/R     | S   | I   | R   | -   | S/S     |
| 55              | <i>K.oxy.</i>  | R/R     | R   | R   | R/-         | R   | R   | R   | R   | R   | R   | S   | S   | -   | -         | R/R     | S   | R   | R   | -   | S/S     |
| 25              | <i>K.spec.</i> | -/-     | -   | -   | -           | -   | -   | -   | -   | -   | -   | -   | -   | -   | -         | -       | -   | -   | -   | -   | -/-     |
| 52              | <i>K.oxy.</i>  | R/R     | I   | R   | R           | R   | R   | R   | R   | R   | R   | S   | S   | -   | -         | R/R     | I   | R   | R   | -   | R/R     |
| 49              | <i>K.spec.</i> | R/-     | -   | R   | R           | R   | -   | -   | -   | R   | R   | -   | S   | -   | R         | R/S     | -   | R   | R   | -   | R/-     |
| 20              | <i>E.coli</i>  | R/R     | I   | R   | S/-         | R   | R   | R   | R   | R   | R   | R   | S   | -   | -         | S/S     | S   | S   | S   | -   | R/R     |
| 33              | <i>E.coli</i>  | R/R     | R   | R   | R/-         | R   | R   | R   | R   | R   | R   | R   | S   | -   | -         | R/R     | S   | R   | R   | -   | R/R     |
| 48              | <i>E.coli</i>  | R/R     | R   | R   | R           | R   | R   | R   | R   | R   | R   | R   | S   | -   | -         | R/R     | S   | R   | S   | -   | R/R     |
| 30              | <i>E.coli</i>  | R/R     | R   | R   | S/-         | R   | R   | R   | R   | R   | R   | R   | S   | -   | -         | R/R     | S   | R   | S   | -   | R/R     |
| 32              | <i>E.coli</i>  | R/R     | R   | R   | R           | R   | R   | R   | R   | R   | R   | R   | S   | -   | -         | R/R     | R   | R   | R   | -   | R/R     |
| 22              | <i>K.pneu.</i> | R/R     | R   | R   | R           | R   | R   | R   | R   | R   | R   | R   | S   | -   | -         | R/R     | S   | R   | R   | -   | R/R     |
| 50              | <i>K.pneu.</i> | R/R     | R   | R   | R           | R   | R   | R   | R   | R   | R   | R   | S   | S   | -         | R/R     | I   | R   | R   | -   | R/R     |
| 21              | <i>K.ter.</i>  | R/R     | R   | R   | R           | R   | R   | R   | R   | R   | R   | R   | S   | -   | -         | R/R     | S   | R   | R   | -   | R/R     |
| 51              | <i>K.spec.</i> | R/-     | R   | R   | R           | R   | -   | -   | -   | R   | R   | -   | S   | -   | -         | R/R     | -   | R   | R   | -   | R/-     |
| 56              | <i>E.coli</i>  | R/-     | -   | R   | R/-         | R   | -   | -   | -   | R   | R   | -   | S   | -   | R         | S/S     | -   | R   | I   | -   | S/-     |
| 46              | <i>E.coli</i>  | R/R     | R   | R   | -/R         | R   | R   | R   | R   | R   | R   | R   | S   | S   | R         | R/R     | S   | R   | R   | -   | R/R     |
| 44              | <i>E.coli</i>  | R/R     | R   | R   | -/R         | R   | R   | R   | R   | R   | R   | R   | S   | -   | -         | R/R     | S   | R   | R   | -   | R/R     |
| 53              | <i>E.coli</i>  | R/R     | R   | R   | R/R         | R   | R   | R   | R   | R   | R   | R   | S   | -   | -         | R/R     | S   | R   | R   | S   | R/R     |
| 31              | <i>E.coli</i>  | R/R     | R   | R   | -/R         | R   | R   | R   | R   | R   | R   | S   | S   | -   | R         | R/R     | R   | R   | R   | -   | R/R     |
| 54              | <i>C.freu.</i> | R/-     | R   | R   | -           | R   | -   | -   | -   | R   | R   | -   | S   | -   | -         | S/S     | -   | S   | S   | -   | S/-     |
| 62              | <i>K.pneu.</i> | R/-     | R   | R   | -           | R   | -   | -   | -   | S   | I   | -   | S   | -   | -         | S/S     | -   | R   | R   | -   | S/-     |
| 23              | <i>R.aqu.</i>  | R/S     | S-  | R   | S           | R   | R   | R   | S   | S   | S   | S   | S   | -   | -         | S/S     | S   | S-  | S   | -   | S/S     |

<sup>a</sup> For better comparison the data was also sorted for different genotypes detected and afterwards clustered for species.

Abbreviations for antibacterial agents: AMC, amoxicillin-clavulanic acid; AMK, amikacin; AMX, ampicillin; CAZ, ceftazidime; CEC, cefaclor; CFZ, cefazolin; CIP, ciprofloxacin; CPD, cefpodoxime; CRO, ceftriaxone; CTX, cefotaxime; CXM, cefuroxime; DOX, doxycycline; FEP, cefepime; FOF, fosfomycin; FOX, ceftoxitin; GEN, gentamicin; IMP, imipenem; LEV, levofloxacin; MER, meropenem; MEZ, mezlocillin; MXF, moxifloxacin; NIT, nitrofurantoin; PIP, piperacillin; PIP-SUL, piperacillin-sulbactam; SAM, ampicillin-sulbactam; SXT, trimethoprim-sulfamethoxazole; TET, tetracycline; TOB, tobramycin; TZP, piperacillin-tazobactam.



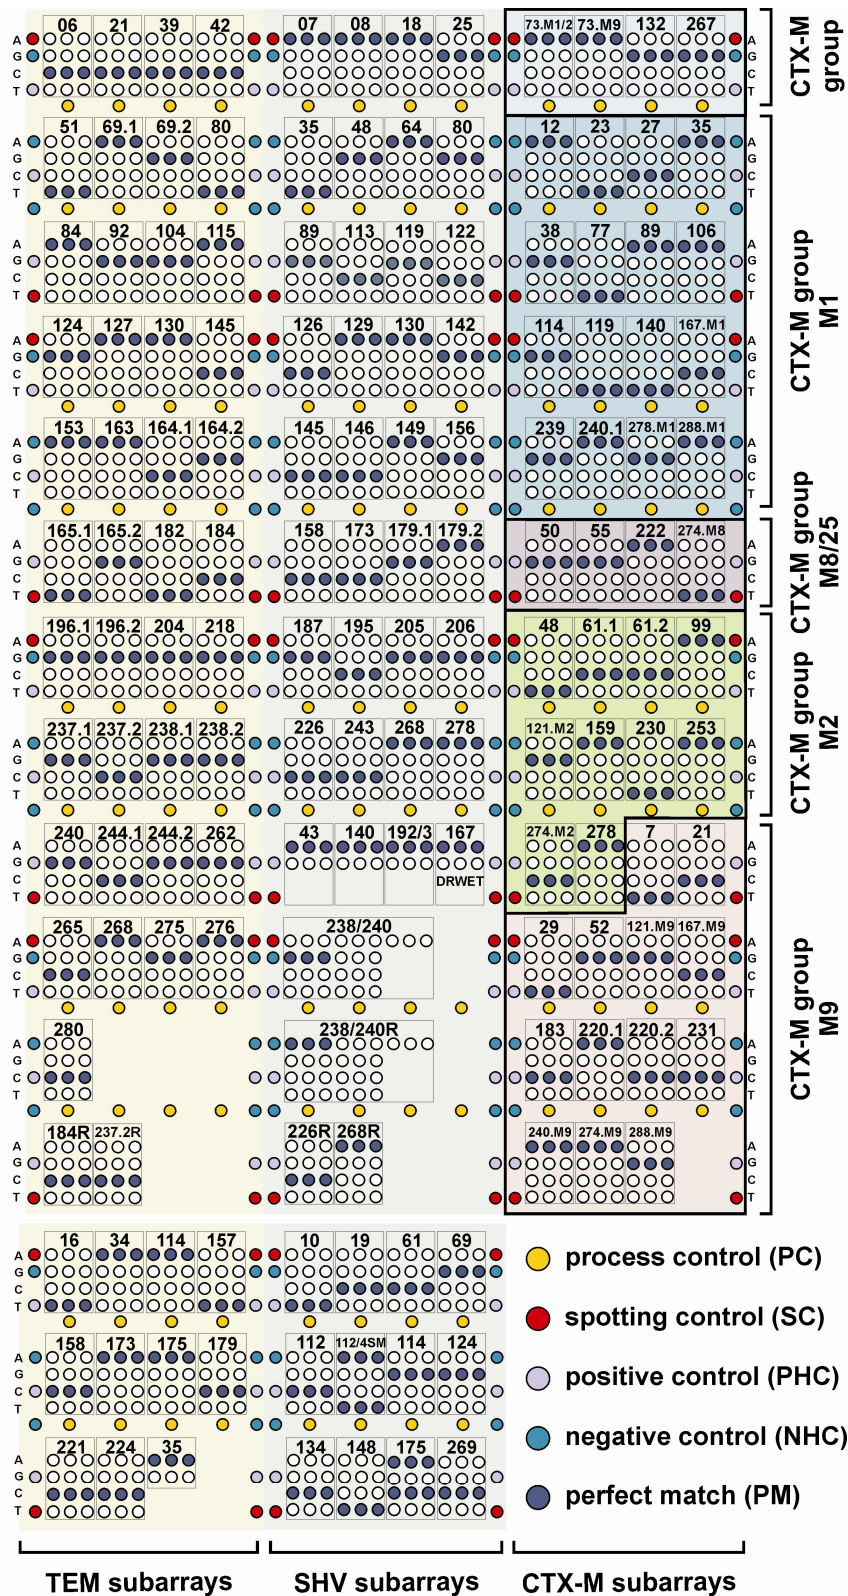

Figure S1 (supplementary material): Enlarged chip layout. Schematic representation of the modular layout of the oligonucleotide microarray. The areas specific for the different lactamase genes and the different subgroups of the CTX-M type genes are labeled. Theoretical perfect matches after hybridization with TEM-1, SHV-1, CTX M 1, CTX-M-2, CTX-M-8 and CTX-M-9 respectively are highlighted in dark blue.
